# Supplementary material for: Novel bodipy—cellulose nanohybrids for the production of singlet oxygen
Source: Royal Society of Chemistry journal article supplement (doi:10.1039/c6ra04275a), 2016-01-01
Supplement: c6ra04275a1.pdf [file c6ra04275a1.pdf]

*Electronic Supplementary information for*

## **Novel bodipy—cellulose nanohybrids for production of singlet oxygen**

by

**Prashant Chauhan<sup>a,b</sup> and Ning Yan<sup>a,b\*</sup>**

<sup>a</sup> *Faculty of Forestry, University of Toronto, 33 Willcock Street, Toronto, ON, Canada, M5S3B3. Email: [ning.yan@utoronto.ca](mailto:ning.yan@utoronto.ca) ; Phone: +1 (416) 946-8070.*

<sup>b</sup> *Department of Chemical Engineering and Applied Chemistry, University of Toronto, 200 College Street, Toronto, ON, Canada, M5S 3E5.*

\* \* \*

## Table of contents

1. General information
2. Synthesis of Bodipy dye derivative
3. Synthesis of Cellulose Nanocrystals (NC)
4. Synthesis of Amino Cellulose Nanocrystals (NC-NH<sub>2</sub>)
5. Degree of substitution of primary amino groups
6. Synthesis of Nanocellulose-bodipy conjugate (NC-SB)
7. Inductive coupled plasma atomic emission spectroscopy (ICP-AES) analysis
8. X-ray photoelectron spectroscopy (XPS) analysis
9. Singlet Oxygen Production test with ABDA
10. Photooxidation of L-methionine methyl ester
11. References

### 1. General Information

All the reagents and chemicals were purchased from Sigma Aldrich® Canada. Z-potential experiments were conducted on a Brookhaven Instruments Corporation instrument (Zeta Plus). Thermal analysis were performed on a (TGA Q500) TA instrument with a programme tuned to temperature ranging from 10 to 100 °C at a rate of 10°C/min, stable for 5 min at 100 °C, again temperature increased upto 800 °C at a rate of 10°C/min. Ultra-centrifugations were carried out with a Beckman Coulter centrifuge. TEM images were captured on a Hitachi H7000 transmission electron microscope and the images where analysed with the ImageJ software for crystal size measurements. The image length data were evaluated with a Origin 8 software. A 100 W Hg bulb was used as light source. Inductive coupled plasma atomic emission spectroscopy (ICP-AES) analysis was performed on Perkin Elmer Optima 7300 DV instrument. XPS analysis were performed on a Thermo Scientific K-Alpha X-ray Photoelectron Spectrometer (XPS) having a monochromated Al K $\alpha$  X-ray source.

## 2. Synthesis of Bodipy dye derivative

### 1. Synthesis of carboxylated bodipy (1)

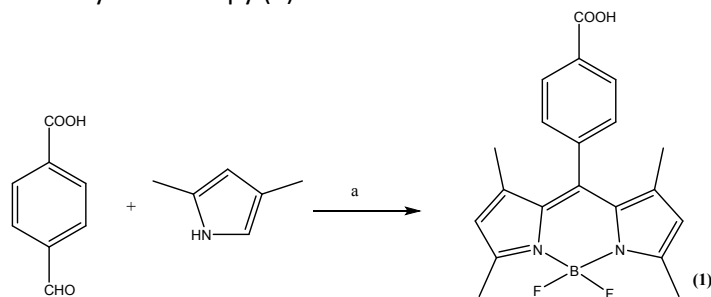

**Scheme S1:** Preparation of carboxylated bodipy: a) TFA, dry  $\text{CH}_2\text{Cl}_2$ , DDQ,  $\text{Et}_3\text{N}$ ,  $\text{BF}_3\cdot\text{Et}_2\text{O}$

In a 3-neck (1 L) round bottom flask, 2.7 g of p-formyl benzoic acid (18.0 mmol) was added. Then, 500 mL dichloromethane was added to the flask. The flask was degassed with Nitrogen. After 30 minutes, 3.7 g of 2,4-dimethyl pyrrole was added (38.8 mmol). After 15 minutes, two drops of Tri-fluoroacetic acid was added to reaction mixture. The flask was covered with aluminium foil and stirred for 20 hours at room temperature. Then, a solution of 4.08 g of DDQ (18.0 mmol) was added in 100 mL dichloromethane. The reaction mixture was stirred for further 4 hours at room temperature. After this, 10 ml of each triethyl amine and boron trifluoride diethyl etherate were successfully added. After stirring for 12 hours at reaction mixture was treated with water (500 mL) and extracted with dichloromethane. The organic layer was treated with anhydrous sodium sulfate and evaporated over rota vapour. The residue was purified over silica gel column chromatography using DCM/MeOH (30:1, v/v) as solvent system, giving the red colour solid bodipy dye (1) in 12 % yield.  $^1\text{H}$  NMR (500 MHz, MeOD): 8.18 (d, 2H), 7.41 (d, 2H), 6.07 (s, 2H), 2.49 (s, 6H), 1.40 (s, 6H). MALDI:  $m/z$  [ $\text{C}_{20}\text{H}_{19}\text{BF}_2\text{N}_2\text{O}_2$ ] $^-$ : 368.15.

### 2. Synthesis of sulfonated bodipy (SB)

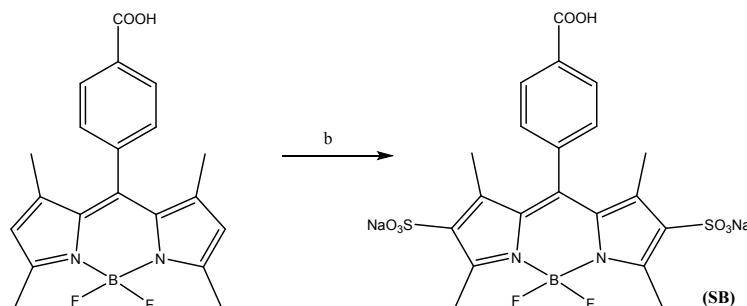

**Scheme S2:** Preparation of sulfonated bodipy: a) chlorosulfonic acid,  $-40^\circ\text{C}$ ,  $\text{NaHCO}_3$

In 50 mL round bottom flask, 0.1 g of bodipy dye (1) (0.2 mmol) was added to 20 mL dichloromethane. The reaction mixture was placed in an ice bath having temperature around -40 °C. To this 50  $\mu$ L of chlorosulfonic acid (0.75 mmol) and stirred for 20 minutes. Then, the ice bath was removed and the reaction mixture was allowed to attain the room temperature. The solvent was removed over rota vapour and re-dissolved in a 10 mL aqueous solution of sodium bicarbonate (40 mM). The solvent was removed over rota vapour. The product purified over reverse phase silica column chromatography using methanol as solvent, giving the desired sulfonated bodipy (SB) as red solid in 40 % yield.  $^1\text{H}$  NMR (500 MHz, MeOD): 8.18 (d, 2H), 7.49 (d, 2H), 2.66 (s, 6H), 1.94 (s, 6H). MALDI: m/z  $[\text{C}_{20}\text{H}_{17}\text{BF}_2\text{N}_2\text{Na}_2\text{O}_8\text{S}_2]^{2-}$ : [(m/z)-2Na] $^{2-}$ : 311.15.  $^{11}\text{B}$  NMR (400 MHz, MeOD): 0.71.  $^{19}\text{F}$  NMR (400 MHz, MeOD): -144.24.

### NMR Spectra

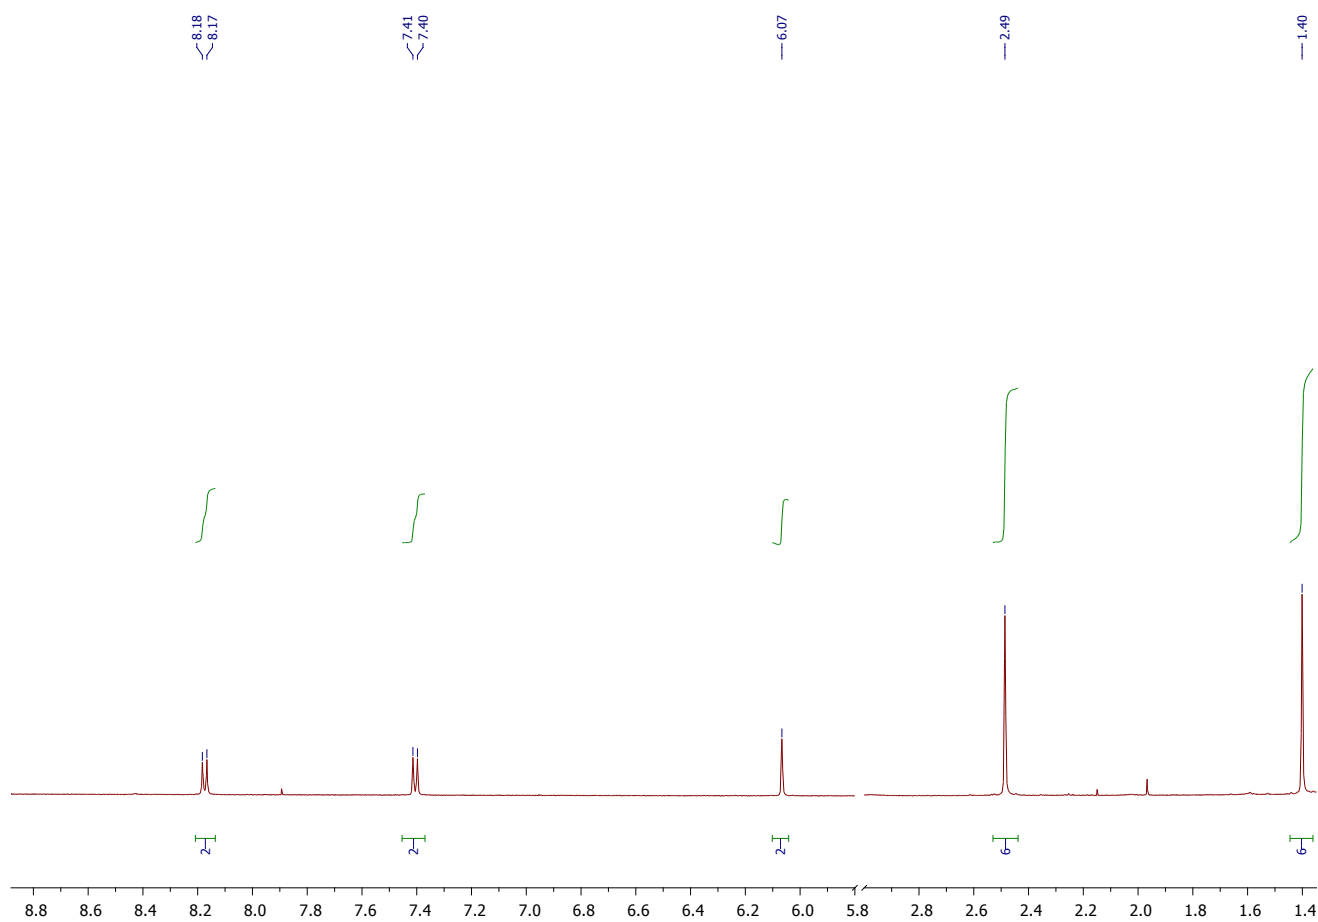

**Figure 1:**  $^1\text{H}$  NMR spectra of carboxylated bodipy (1) (500 MHz in MeOD)

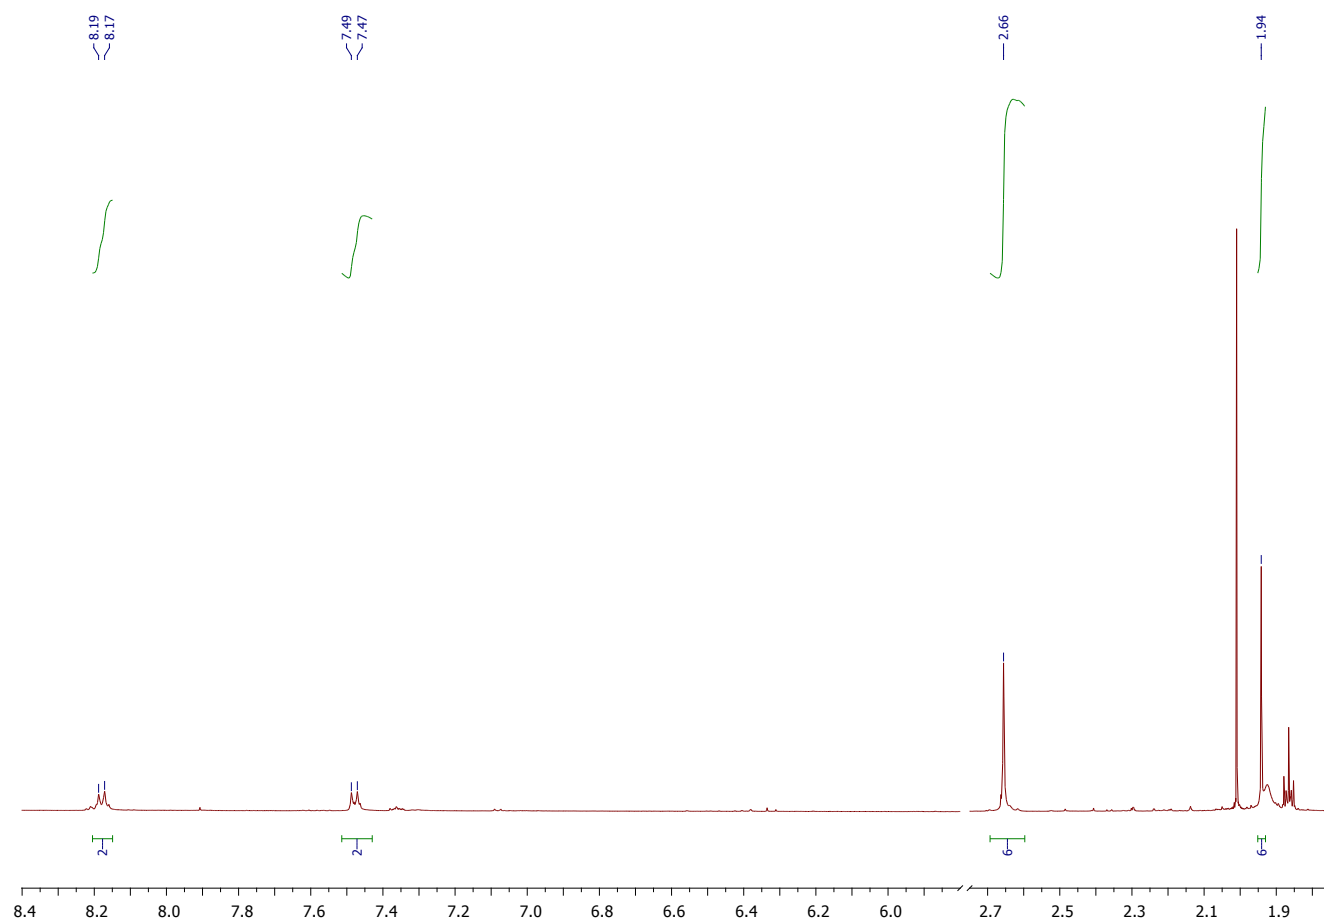

**Figure 2:**  $^1\text{H}$  NMR spectra of sulfonated bodipy (SB) (500 MHz in  $\text{MeOD}$ )

11 B MeOH 400 MHz

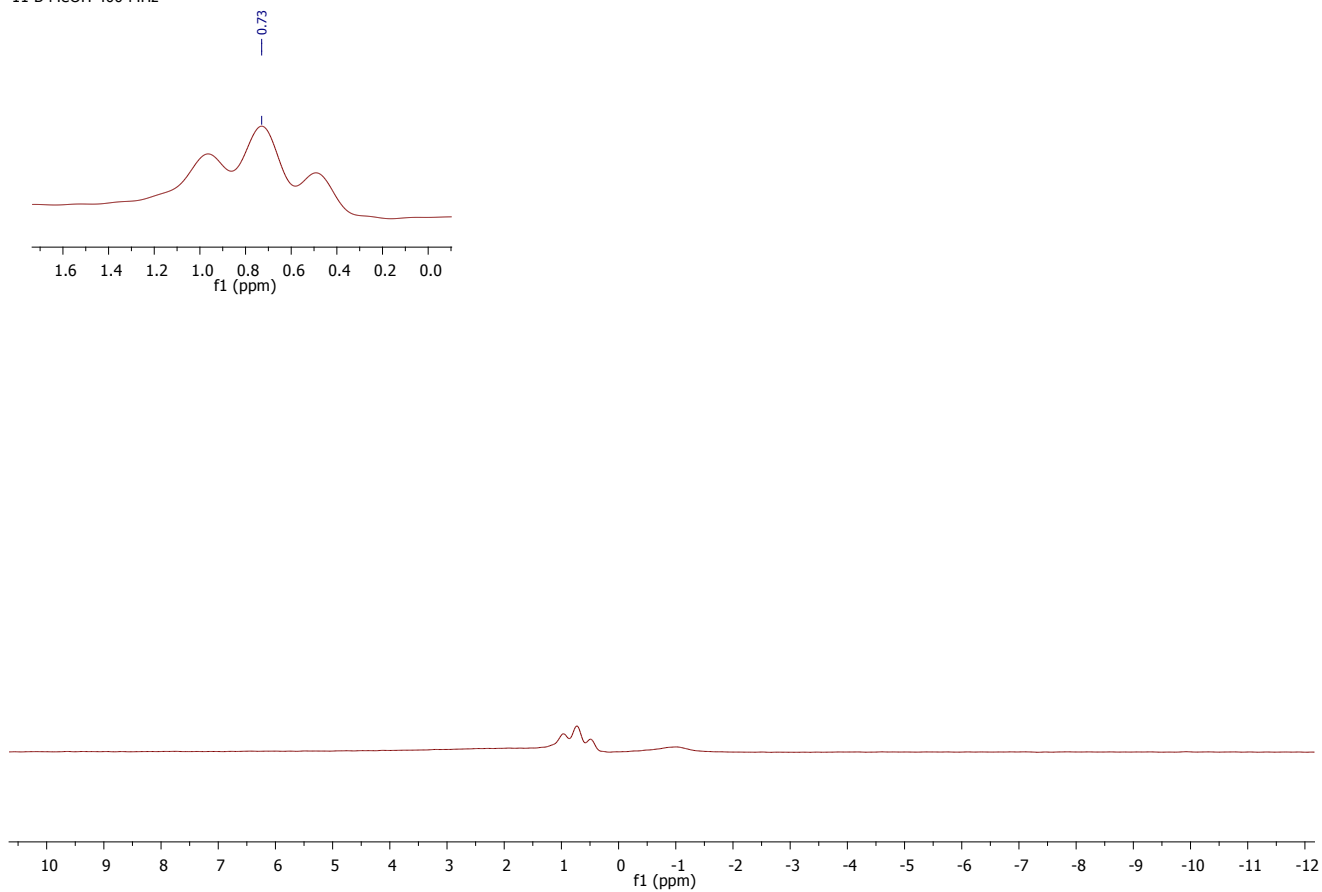

**Figure 3:**  $^{11}\text{B}$  NMR spectra of sulfonated bodipy (SB) (400 MHz in  $\text{MeOD}$ )

$^{19}\text{F}$  MeOH 400 MHz

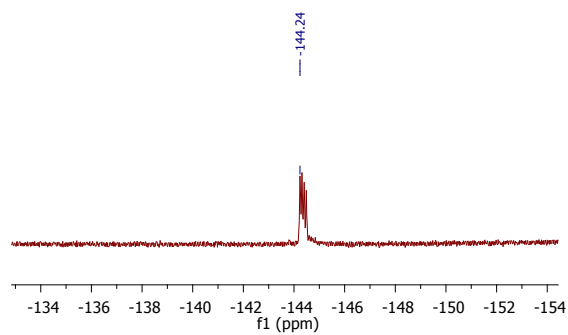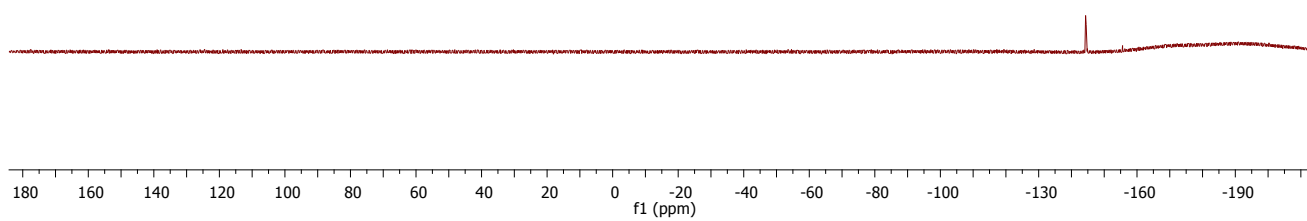

**Figure 4:**  $^{19}\text{F}$  NMR spectra of sulfonated bodipy (SB) (400 MHz in MeOD)

<<J7\_MS>> 4700 Reflector Spec #1 MC[BP = 311.0, 60]

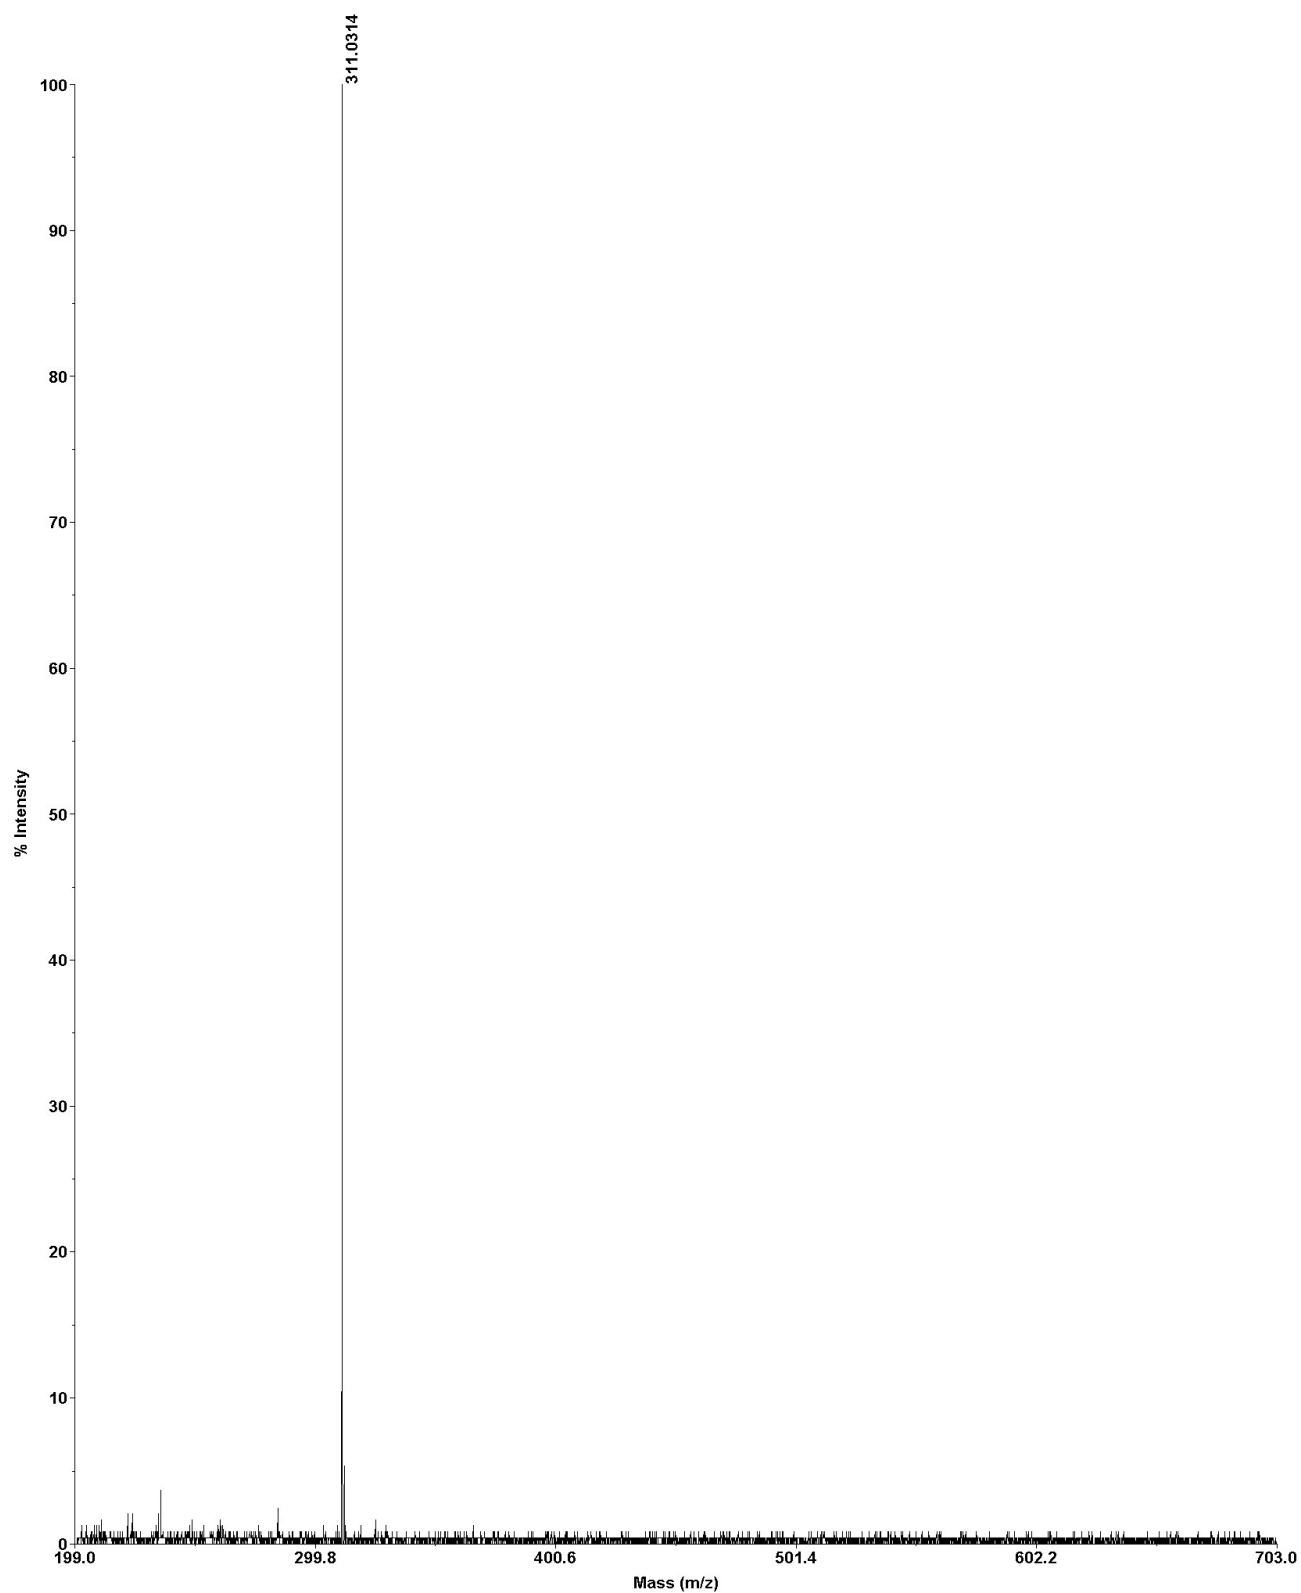

C:\...c.T2D  
Acquired:

**Figure 5:** MALDI spectra of sulfonated bodipy (SB)



### 3. Synthesis of Cellulose Nanocrystals (NC)

To a preheated (at 45 °C) 37 mL solution of (64%) sulfuric acid, 5 gm of MCC (microcrystalline cellulose) was added. The white suspension thus formed was stirred for 2 hours. The hydrolysis was stopped by adding the 10 fold of water to the suspension. The suspension was subjected to centrifugation treatment at 5K rpm for 5 minutes to remove the most of acidic supernatant. The remaining white solid was again washed with water until neutral pH was achieved. Finally, the NC was recovered by centrifugation at 10K rpm for 5 minutes. The NC was transferred in dialysis tubes (12kD cut off) and dialysed against milliQ water for 3 days. The NC was recovered by lyophilization in ~50 % yield.

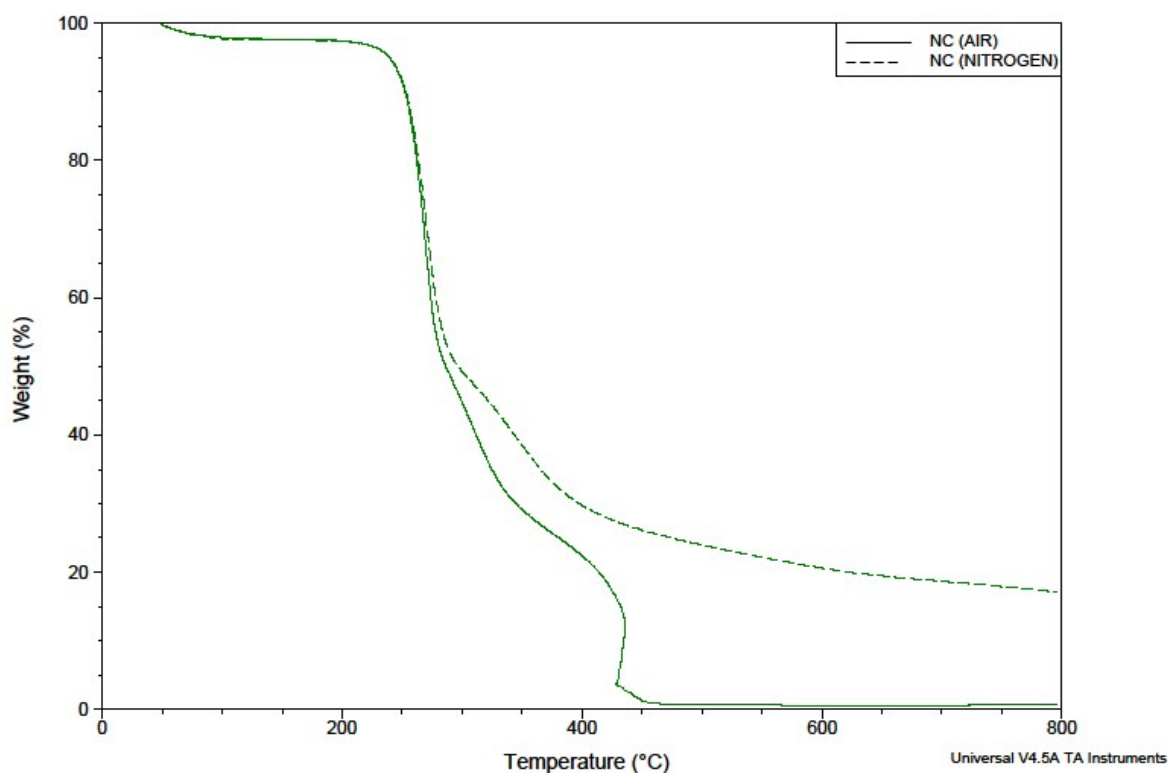

**Figure 6:** TGA curves of NC in presence of air and nitrogen

| NC aqueous suspension (1mg/mL) | ζ-Potential (mV) |
|--------------------------------|------------------|
| 1 <sup>st</sup> reading        | -27.0            |
| 2 <sup>nd</sup> reading        | -26.4            |
| 3 <sup>rd</sup> reading        | -26.6            |
| 4 <sup>th</sup> reading        | -26.4            |
| Arithmetic Average             | -26.6            |

**Table S1:** ζ-potential values for NC

#### 4. Synthesis of Amino Cellulose Nanocrystals (NC-NH<sub>2</sub>)

To a 40 mL NaOH (1M) solution, 0.5 g of NC was added and sonicated for 15 minutes. To this suspension 231.25 μL of epichlorohydrin (3.0 mmol) was added and was heated at 60 °C for 2 hours. The suspension was transferred in dialysis tube (Spectra/Por 4 dialysis tubing) and dialysed against water until pH below 12 was achieved. After readjusting the pH again to 12 with 50% (w/v) NaOH, 2.5 mL of NH<sub>4</sub>OH solution was added to the reaction mixture and was stirred for 2 hours at 60 °C temperature. The reaction mixture was transferred in dialysis tube and dialysed against milliQ water until the pH 7 was obtained. The solid product in 0.25 g yield was recovered by lyophilization.

| NC-NH <sub>2</sub> aqueous suspension (1mg/mL) | ζ-Potential (mV) |
|------------------------------------------------|------------------|
| 1 <sup>st</sup> reading                        | -29.5            |
| 2 <sup>nd</sup> reading                        | -29.5            |
| 3 <sup>rd</sup> reading                        | -30.0            |
| 4 <sup>th</sup> reading                        | -29.0            |
| Arithmetic Average                             | -29.5            |

**Table S2:** ζ-potential values for NC-NH<sub>2</sub>

## 5. Degree of substitution of primary amino groups

Kaiser test was employed for detection of primary amino group in NC. It is a simple Ninhydrin test which is used to quantify presence of primary amino group.

The presence of a primary amino group can be detected by formation of blue colour. By exploiting the absorption peak in the UV- visible spectrum at 570 nm, we can estimate the amino groups. According to Lambert-Beer law, absorbance can be associated with concentration of free amino as follows:

$$\frac{\text{mmol}}{\text{g}} = \frac{(\text{Abs sample} - \text{Abs blank}) \times \text{dilution (mL)} \times 10^3}{\text{Extinction coefficient} \times \text{Sample weight (mg)}}$$

Where Abs sample is absorbance of the ninhydrin complex, Abs blank is the absorbance of the blank (ethanolic soln. of phenol, KCN soln. in pyridine and ethanolic soln. of ninhydrin) recorded at 570 nm. The extinction coefficient is  $15000 \text{ m}^{-1} \text{ cm}^{-1}$ , as reported in literature.<sup>R1</sup>

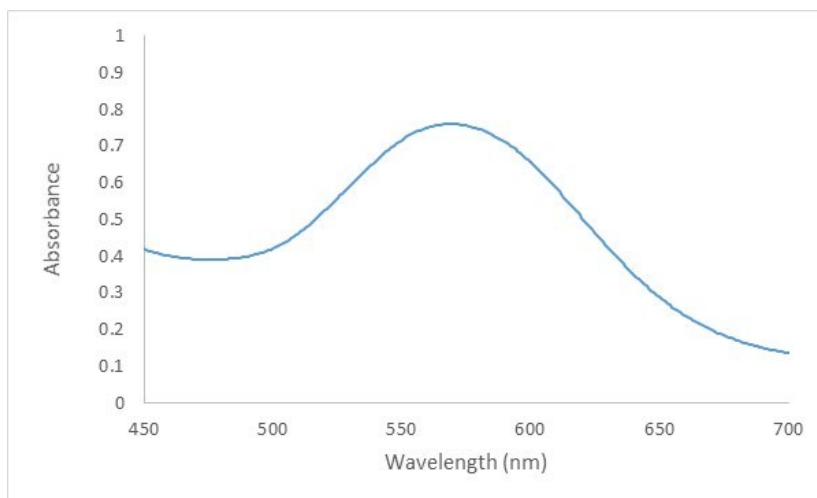

**Figure 7:** UV visible spectrum of blue colour suspension from Kaiser test at 570nm

Abs sample: 0.760      Abs blank: 0.020      Dilution: 3 mL      Sample weight: 0.25 mg

The degree of substitution of primary amino group was calculated to be 0.60 mmol per gram of NC.

## 6. Synthesis of Nanocellulose-bodipy conjugate (NC-SB)

0.1 g of SB bodipy (0.17 mmol) was added to a 20 mL (50 mM, pH-4) MES buffer solution. After 5 minutes, 0.33 g of EDC.HCl (1.7 mmol) and 0.20 g of NHS (1.7 mmol) were added and stirred for 3 hours. To this, 0.1 g NCC-NH<sub>2</sub> was added. The suspension was stirred for 4 days at room temperature. The suspension was subjected to centrifugation treatment at 10k rpm for 10 minutes. The solid was re-suspended in water and centrifuged again until supernatant was colourless. The suspension was transferred in dialysis tube against brine for 1 day and further 3 days against milliQ water. The red colour solid of NC-SB was recovered by lyophilization in ~ 40 % yield.

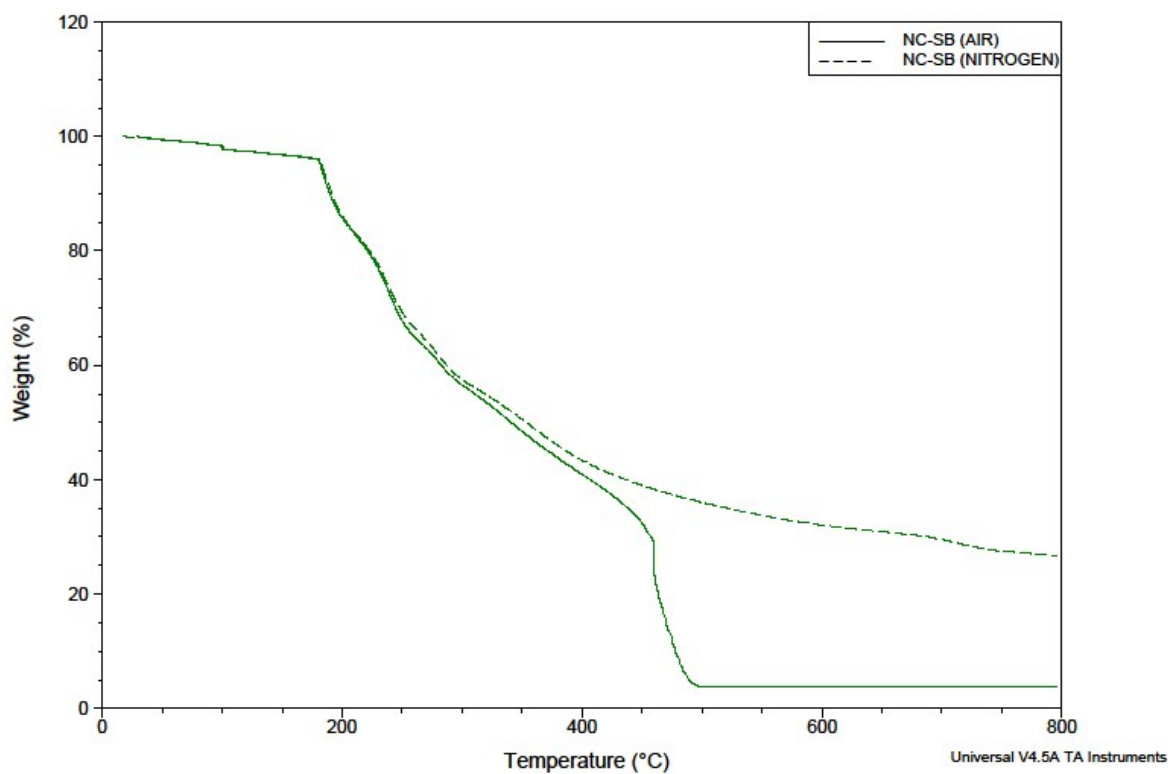

**Figure 8:** TGA curves of NC-SB in presence of air and nitrogen



| NC-SB aqueous suspension (1mg/mL) | ζ-Potential (mV) |
|-----------------------------------|------------------|
| 1 <sup>st</sup> reading           | -33.0            |
| 2 <sup>nd</sup> reading           | -32.0            |
| 3 <sup>rd</sup> reading           | -32.5            |
| 4 <sup>th</sup> reading           | -32.5            |
| Arithmetic Average                | -32.5            |

**Table S3:** ζ-potential values for NC-SB

## 7. Inductive coupled plasma atomic emission spectroscopy (ICP-AES) analysis

30 mg of NC-SB sample was accurately weighed in a small beaker. To this 10 mL of aqua-regia solution of HCl: HNO<sub>3</sub> (3:1) was added. The resultant mixture was covered by a watch glass and allowed to heat at 50 °C for 2 hours. The resultant solution was cooled, filtered and then diluted to 50 mL with 18.2 MΩ deionized water. The resultant solution was then analyzed by ICP-AES. The Boron and Fluorine content was found to be in ratio of 1:2 which concomitant with the bodipy dye SB.

## 8. X-ray photoelectron spectroscopy (XPS) analysis

XPS absorption spectrum of NCC-SB for different metals

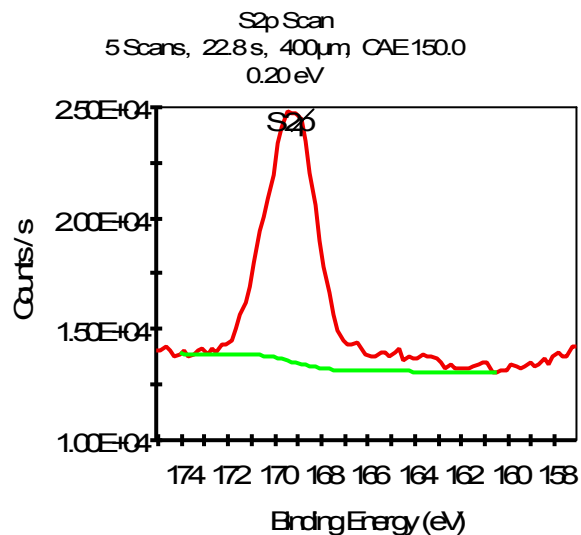

Position=NCC-SB, X=32928.8  $\mu\text{m}$  Y=13988.3  $\mu\text{m}$

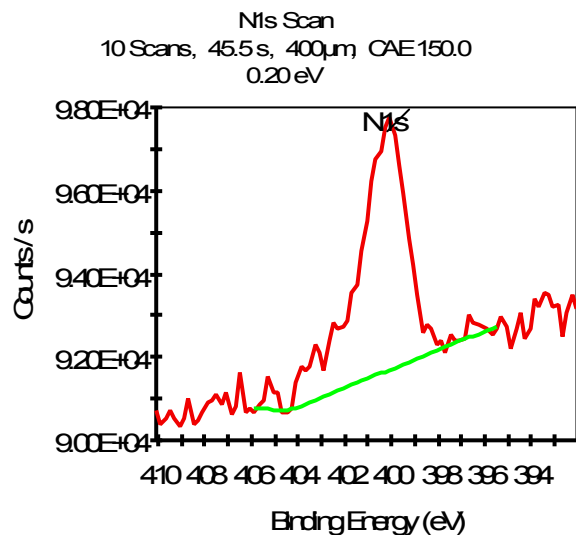

Position=NCC-SB, X=32928.8  $\mu\text{m}$  Y=13988.3  $\mu\text{m}$

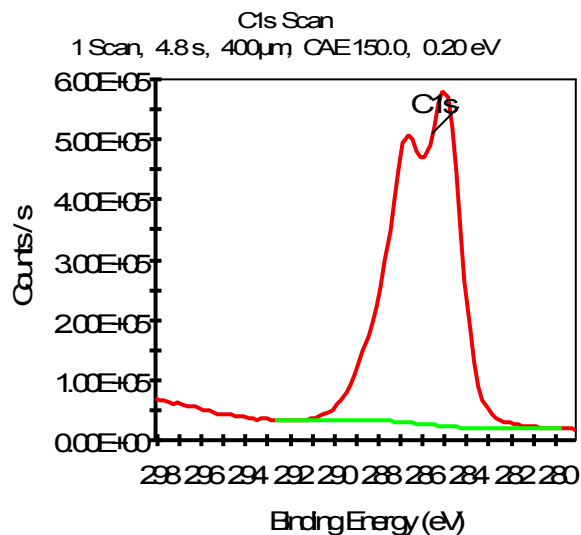

Position=NCC-SB, X=32928.8  $\mu\text{m}$  Y=13988.3  $\mu\text{m}$

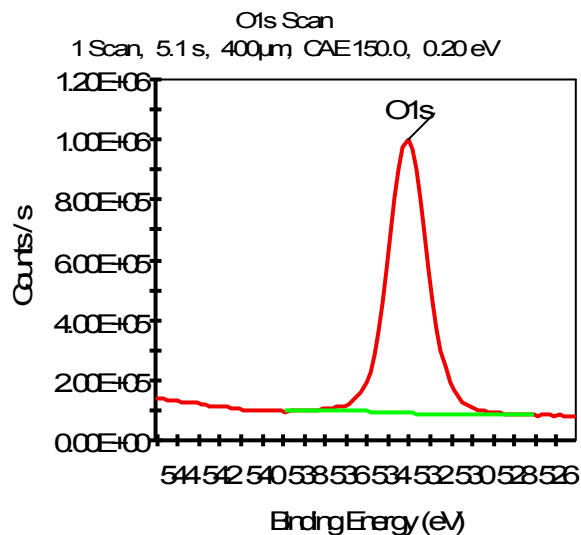

Position=NCC-SB, X=32928.8  $\mu\text{m}$  Y=13988.3  $\mu\text{m}$

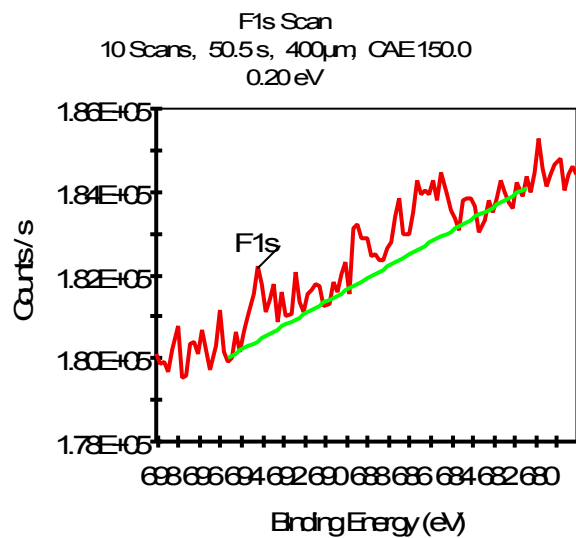

Position=NCC/5B, X=32928.8  $\mu\text{m}$  Y=13988.3  $\mu\text{m}$

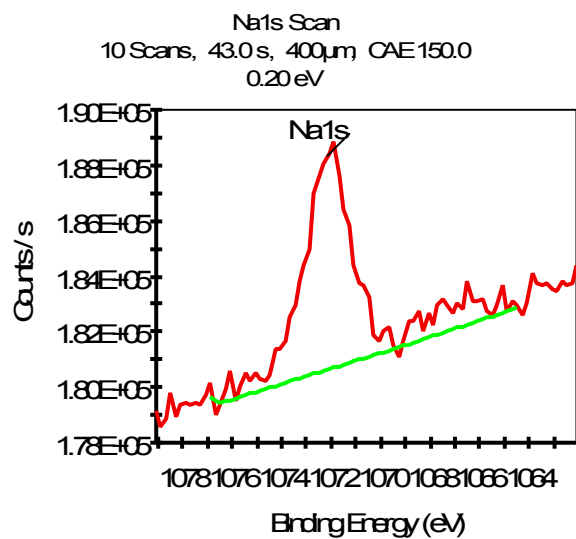

Position=NCC/5B, X=32928.8  $\mu\text{m}$  Y=13988.3  $\mu\text{m}$

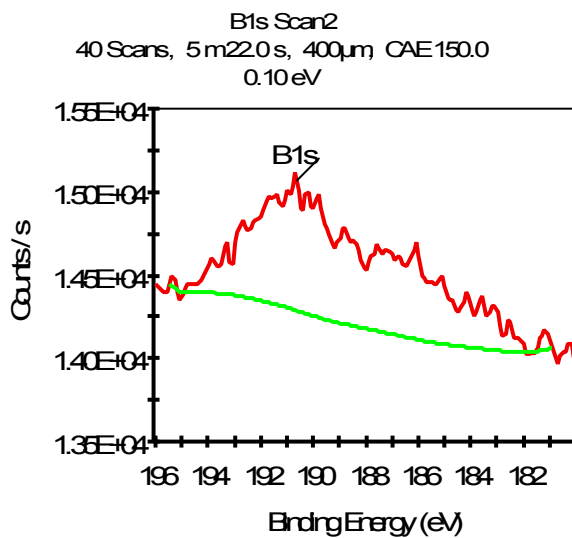

Position=NCC/5B, X=32928.8  $\mu\text{m}$  Y=13988.3  $\mu\text{m}$



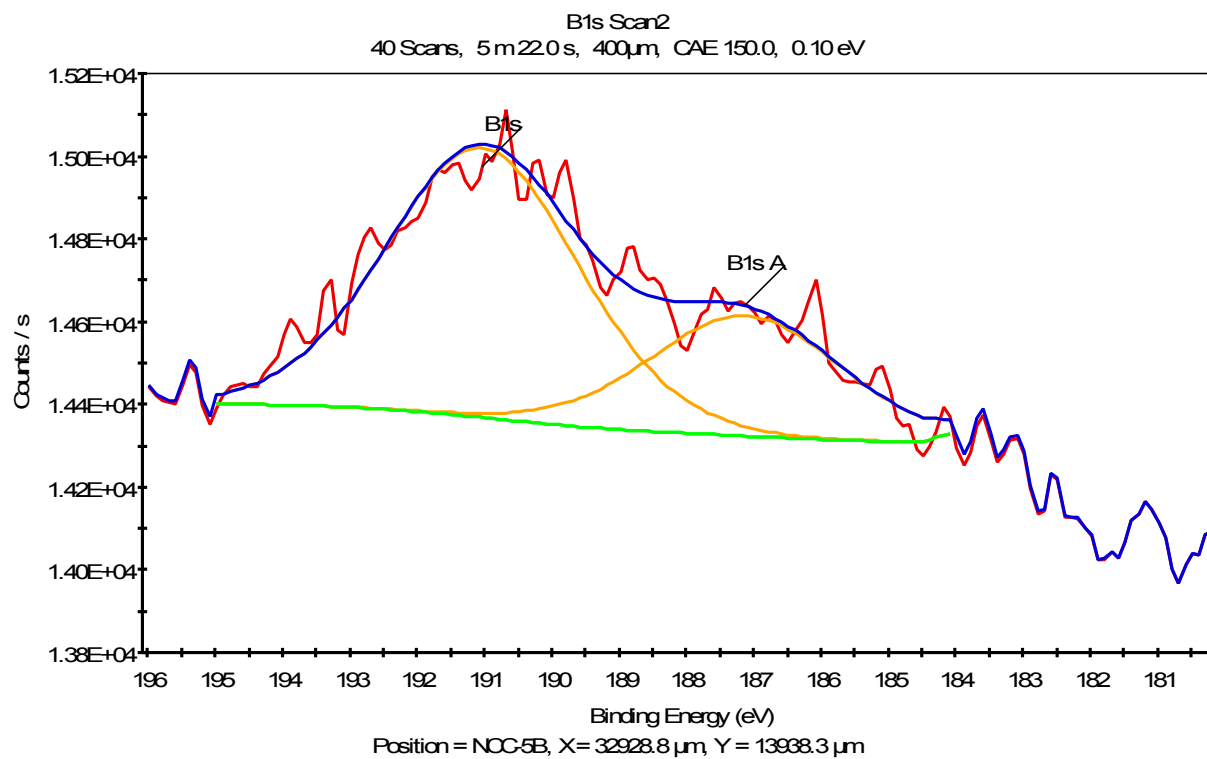

### Elemental ID and Quantification

| <i><b>Name</b></i> | <i><b>Peak BE</b></i> | <i><b>FWHM eV</b></i> | <i><b>Area (P) CPS.eV</b></i> | <i><b>Atomic %</b></i> | <i><b>Q</b></i> |
|--------------------|-----------------------|-----------------------|-------------------------------|------------------------|-----------------|
| B1s                | 191.03                | 3.37                  | 2371.05                       | 69.15                  | 1               |
| B1s A              | 187.11                | 3.37                  | 1060.39                       | 30.85                  | 1               |

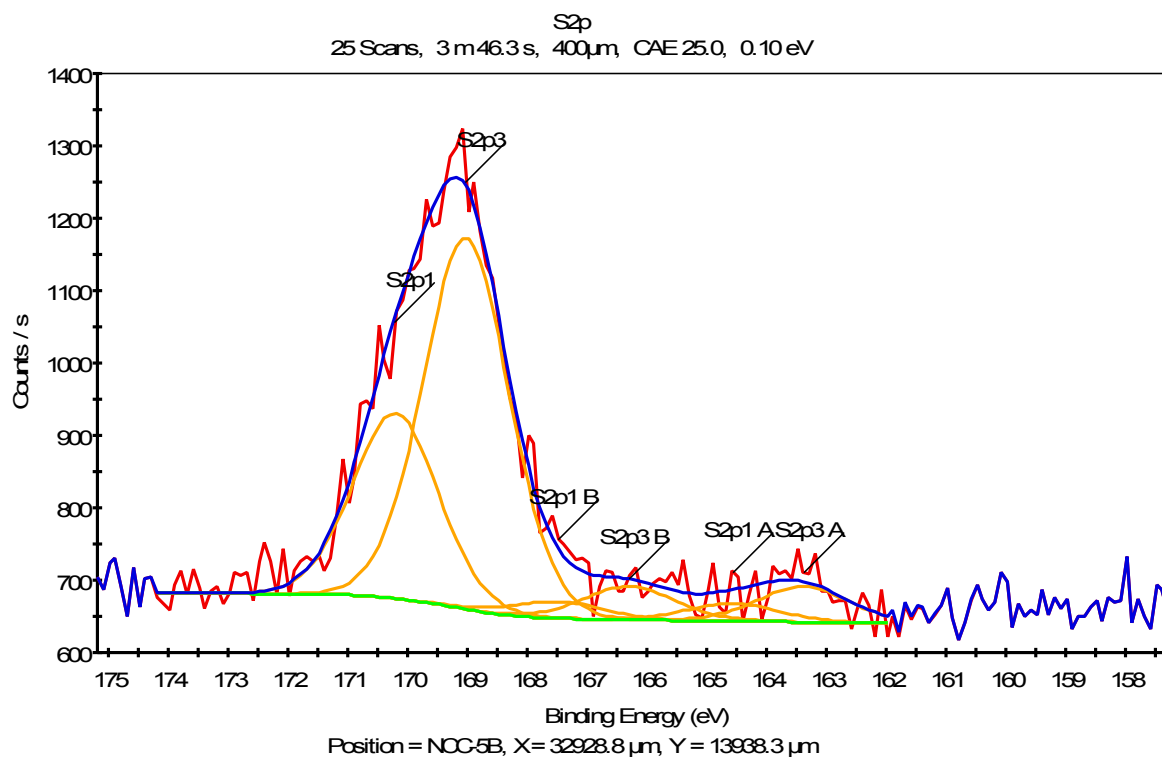

### Elemental ID and Quantification

| <b>Name</b> | <b>Peak BE</b> | <b>FWHM eV</b> | <b>Area (P) CPS.eV</b> | <b>Atomic %</b> | <b>Q</b> |
|-------------|----------------|----------------|------------------------|-----------------|----------|
| S2p3        | 169.01         | 1.68           | 931.67                 | 83.56           | 1        |
| S2p1        | 170.19         | 1.68           | 465.83                 | 0.00            | 0        |
| S2p3 A      | 163.38         | 1.79           | 94.65                  | 8.46            | 1        |
| S2p1 A      | 164.56         | 1.79           | 47.32                  | 0.00            | 0        |
| S2p3 B      | 166.30         | 1.79           | 89.07                  | 7.98            | 1        |
| S2p1 B      | 167.48         | 1.79           | 44.54                  | 0.00            | 0        |

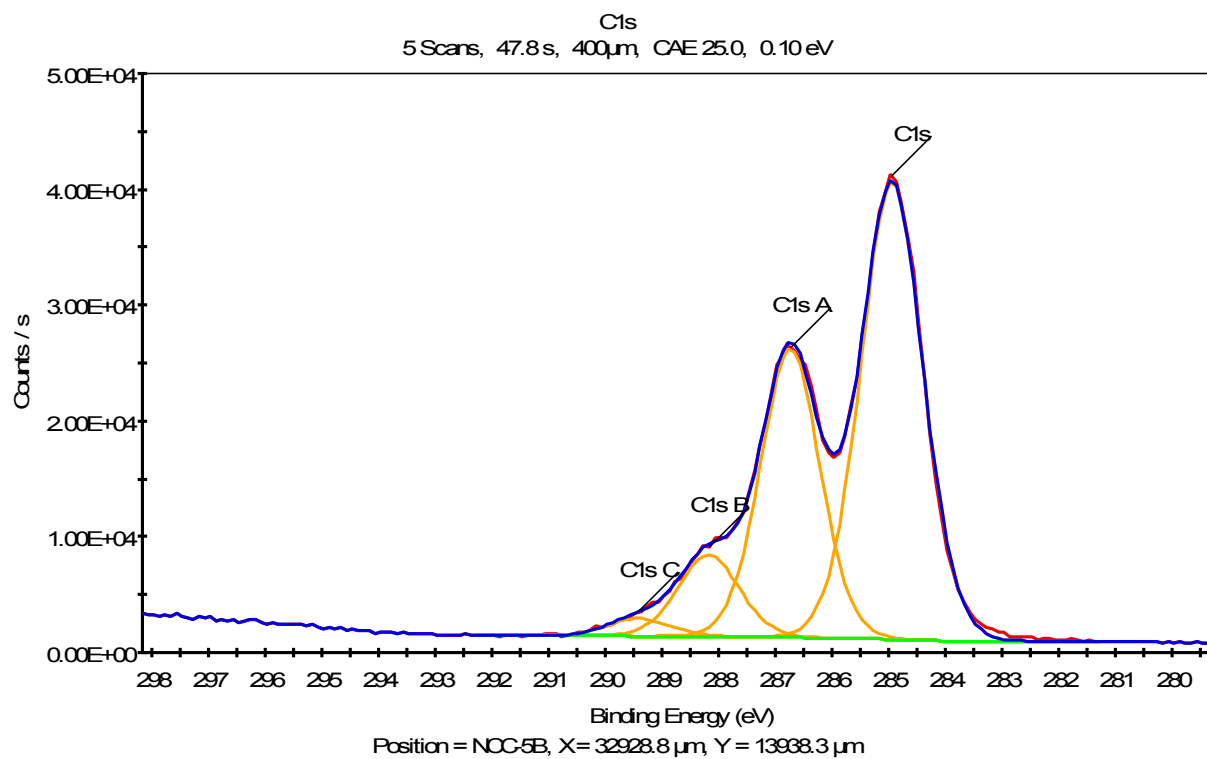

### Elemental ID and Quantification

| <i>Name</i> | <i>Peak BE</i> | <i>FWHM eV</i> | <i>Area (P) CPS.eV</i> | <i>Atomic %</i> | <i>Q</i> |
|-------------|----------------|----------------|------------------------|-----------------|----------|
| C1s         | 284.96         | 1.28           | 54783.25               | 55.11           | 1        |
| C1s A       | 286.75         | 1.22           | 32946.64               | 33.18           | 1        |
| C1s B       | 288.19         | 1.25           | 9542.62                | 9.62            | 1        |
| C1s C       | 289.44         | 1.25           | 2066.74                | 2.09            | 1        |

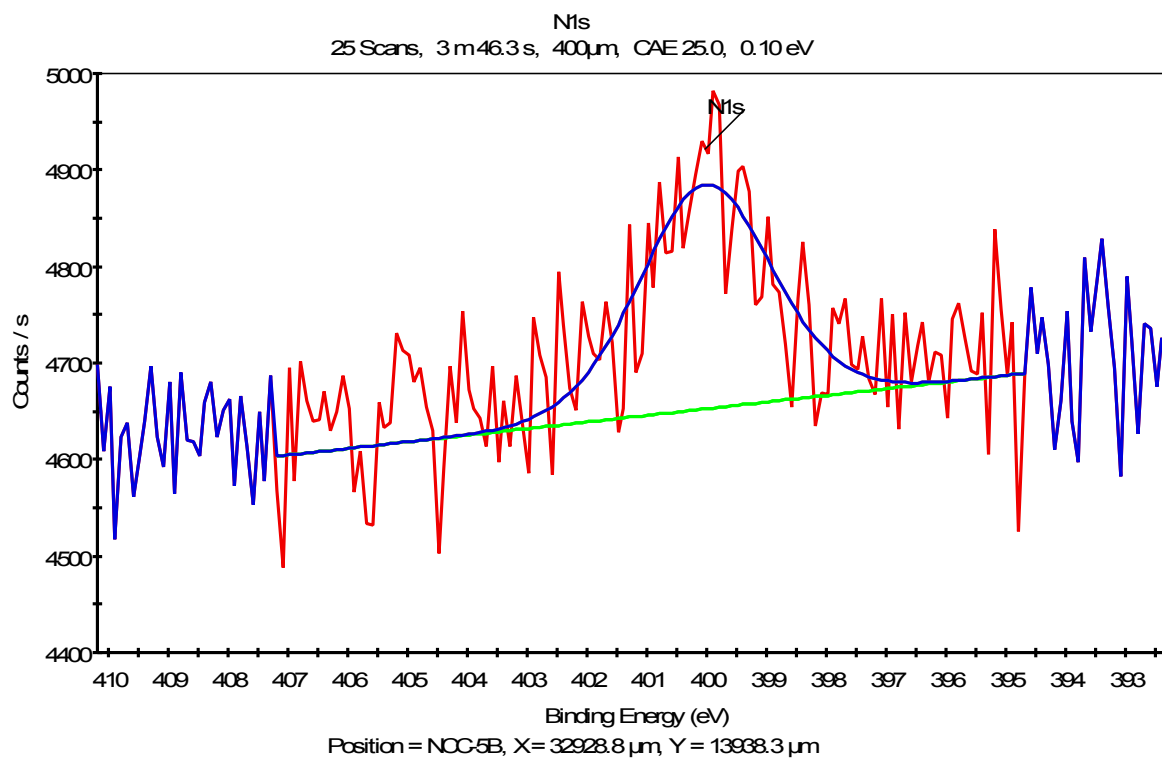

### Elemental ID and Quantification

| <i><b>Name</b></i> | <i><b>Peak BE</b></i> | <i><b>FWHM eV</b></i> | <i><b>Area (P) CPS.eV</b></i> | <i><b>Atomic %</b></i> | <i><b>Q</b></i> |
|--------------------|-----------------------|-----------------------|-------------------------------|------------------------|-----------------|
| N1s                | 400.02                | 2.60                  | 653.48                        | 100.00                 | 1               |

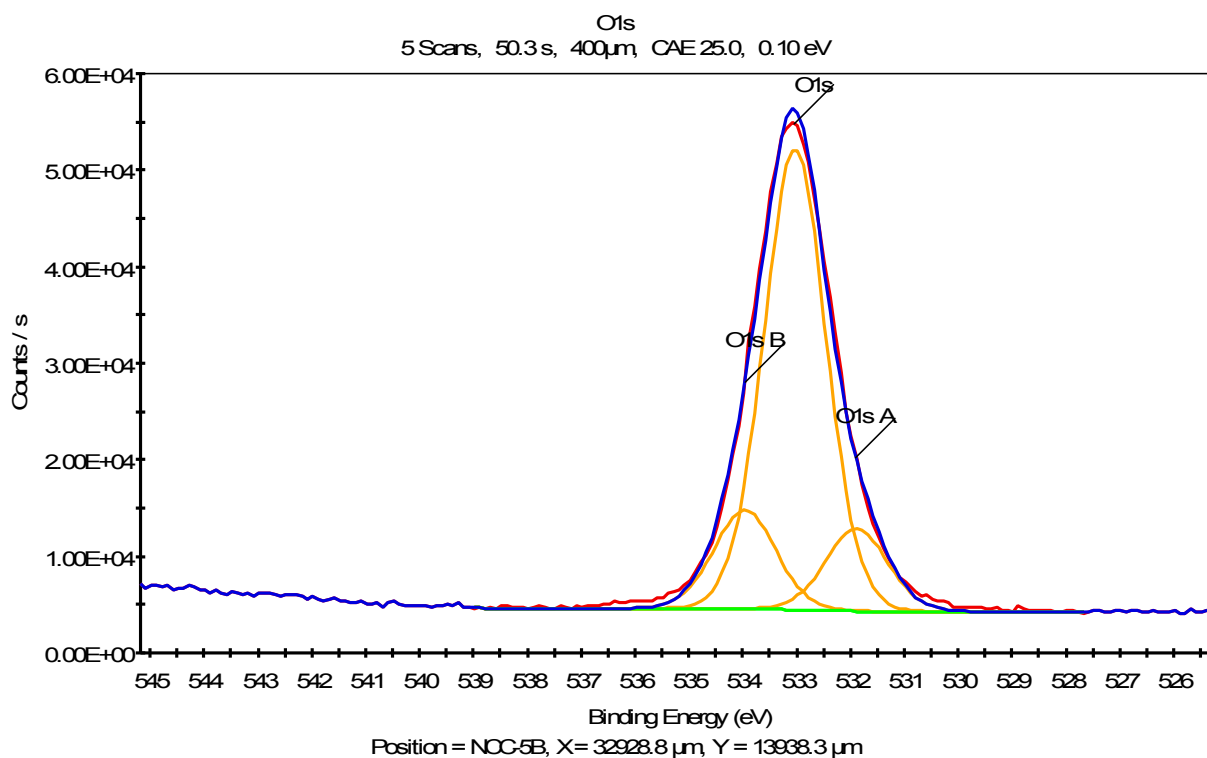

#### Elemental ID and Quantification

| Name  | Peak BE | FWHM eV | Area (P) CPS.eV | Atomic % | Q |
|-------|---------|---------|-----------------|----------|---|
| O1s   | 533.03  | 1.34    | 69358.73        | 71.74    | 1 |
| O1s A | 531.89  | 1.34    | 12444.13        | 12.86    | 1 |
| O1s B | 533.96  | 1.34    | 14877.28        | 15.40    | 1 |

## 9. Singlet Oxygen Production test with ABDA

0.25 mM solution of 9,10-Anthracenediyl-bis(methylene)dimalonic acid (ABDA), was prepared in phosphate buffer (0.001 M, pH -7, D<sub>2</sub>O). The solution was saturated with oxygen for 5 minutes. It was illuminated for 5 minutes in front of white light source ( $75 \pm 5$  mW/cm<sup>2</sup>) lamp (filter >375 nm). It was found that the UV-visible spectrum of ABDA was not affected.

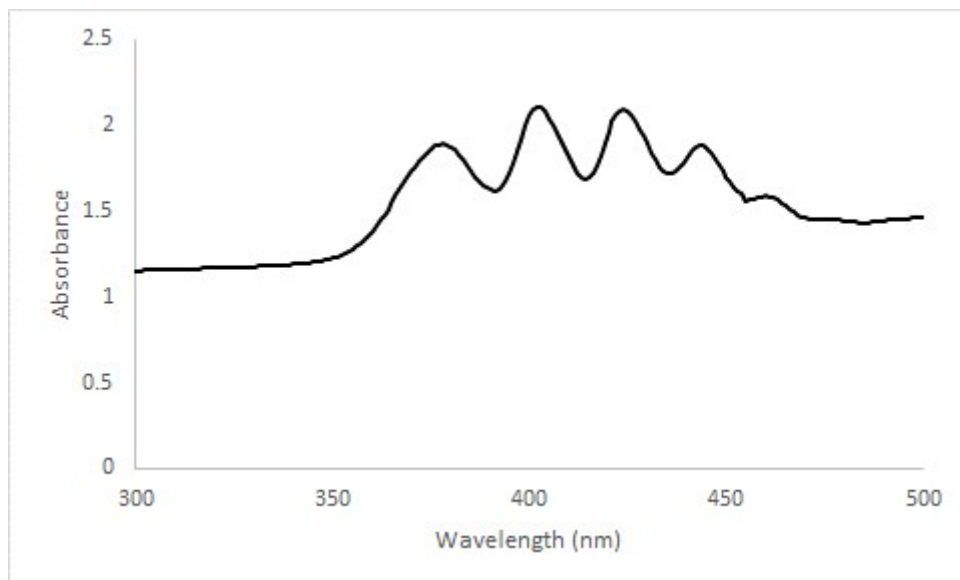

**Figure 9:** UV visible spectrum in the absence of NC-SB

On the contrary, when the same experiment was carried out in the presence of NC-SB (0.3 mg), it was found that there is 10% decrease in ABDA spectrum, when illuminated for 5 minutes.

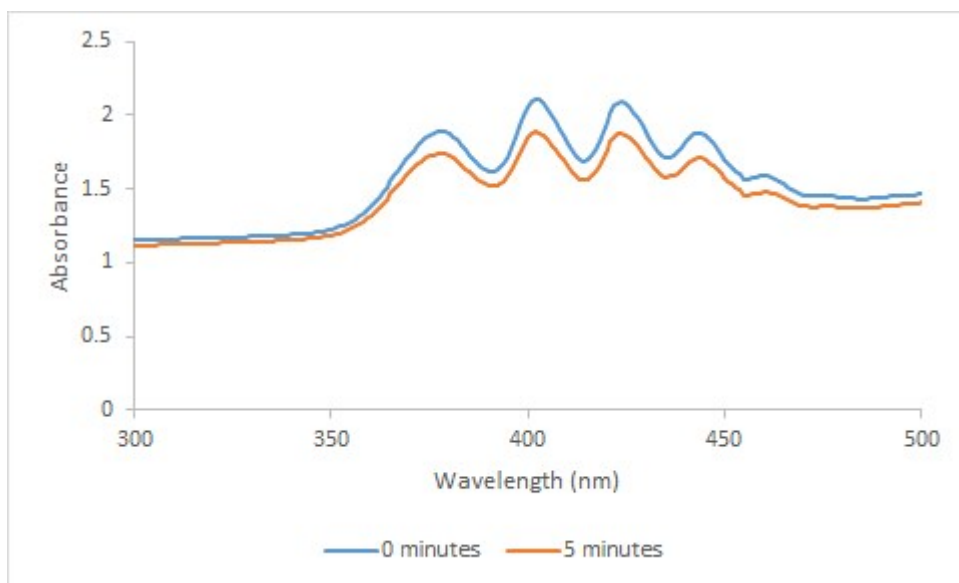

**Figure 10:** UV- visible spectrum in the presence of NC-SB

absorbance at 380 nm in 0 minutes = 2.084

absorbance at 380nm

after 5 minutes = 1.870

$X = 2.084 - 1.870 = 0.214 / 2.084 = 10.26 \%$

## 10. Photooxidation of L-methionine methyl ester

20 mg of L-methionine methyl ester was dissolved in 1.5 mL deuterated water. To this 1mg of NC-SB was added. The suspension was sonicated for 5 minutes. The suspension was transferred to a quartz cuvette, capped with a rubber septum and saturated for 5 minutes. It was illuminated for 210 minutes in front of white light source ( $75 \pm 5$  mW/cm<sup>2</sup> Hg) lamp (filter >375 nm).<sup>R2</sup> Finally, the suspension was centrifuged for 5 minutes at 10k to remove NC-SB and analysed by NMR spectroscopy.

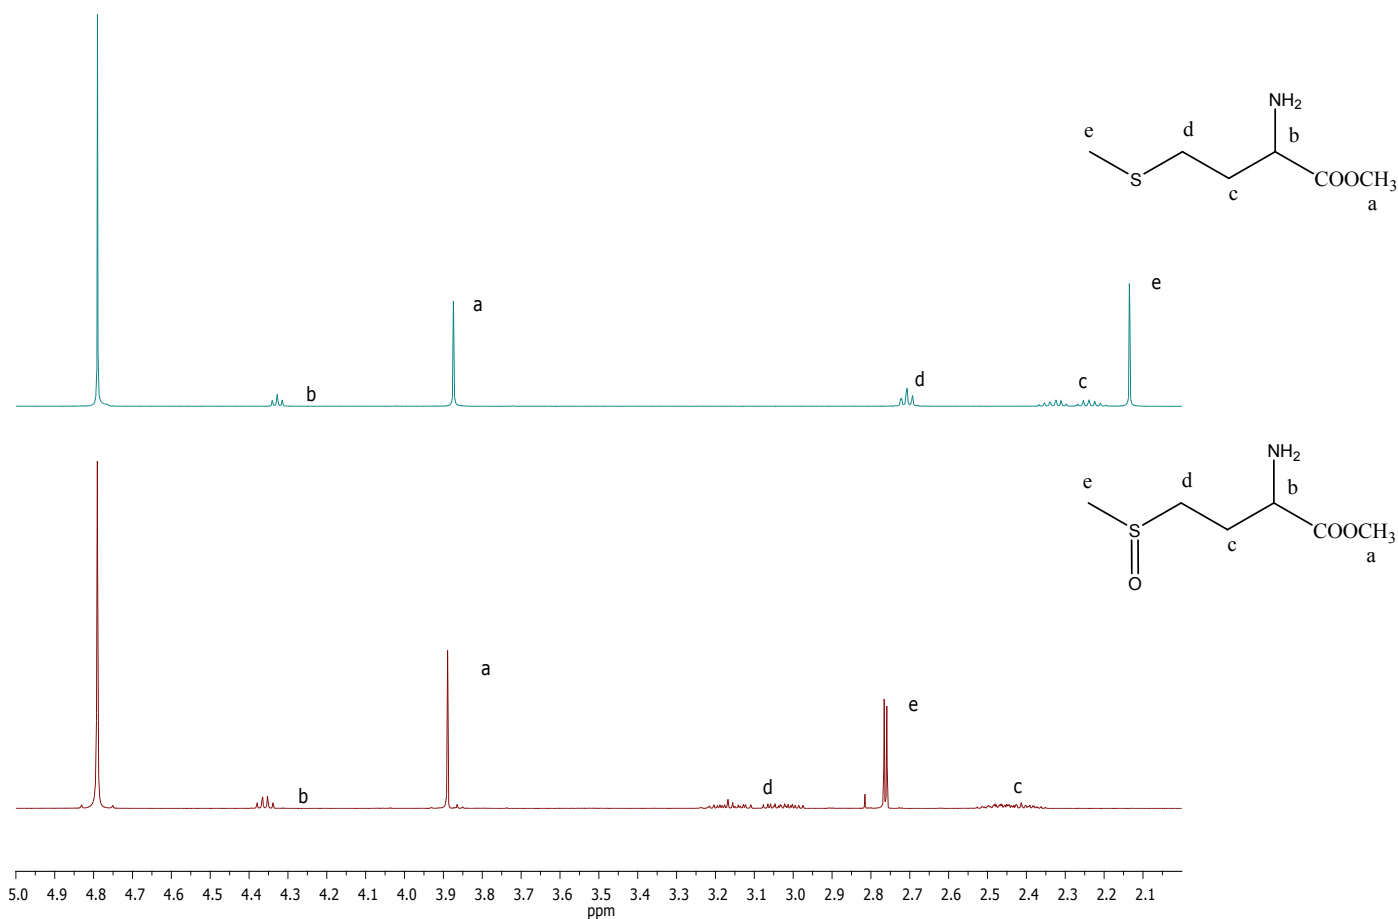

**Figure 11:**  $^1\text{H}$ -NMR spectra of L-methionine methyl ester and its sulfoxide in  $\text{D}_2\text{O}$

## 11. References

R1 E. Kaiser, R. L. Colescott, C. D. Bossinger and P.I. Cook, *Anal. Biochem.*, 1970, **34**, 595-598.

R2 T. Carofiglio, P. Donnola, M. Maggini, M. Rossetto, and E. Rossi, *Adv. Synth. Catal.*, 2008, **350**, 2815.
